# Supplementary material for: Diagnostic and prognostic performance of the LiverRisk score in tertiary care
Source: PubMed Central journal article supplement (PMC11497454; doi:10.1016/j.jhepr.2024.101169), 2024-07-23
Supplement: mmc1.pdf [file mmc1.pdf]

# Diagnostic and prognostic performance of the LiverRisk score in tertiary care

Georg Semmler, Lorenz Balcar, Benedikt Simbrunner, Lukas Hartl, Mathias Jachs, Michael Schwarz, Benedikt Silvester Hofer, Laurenz Fritz, Anna Schedlbauer, Katharina Stopfer, Daniela Neumayer, Jurij Maurer, Sophie Gensluckner, Bernhard Scheiner, Elmar Aigner, Michael Trauner, Thomas Reiberger, Mattias Mandorfer

|                            |    |
|----------------------------|----|
| Table of contents          |    |
| Supplementary results..... | 2  |
| Fig. S1.....               | 3  |
| Fig. S2.....               | 6  |
| Fig. S3.....               | 8  |
| Fig. S4.....               | 9  |
| Table S1.....              | 10 |
| Table S2.....              | 11 |
| Table S3.....              | 12 |
| Table S4.....              | 13 |

## Supplementary results

Regarding patients that were excluded from analysis due to missing laboratory values, the following missingness patterns existed: Of 246 patients excluded from cohort I, 105 (42.7%) were excluded due to missing glucose, 103 (41.9%) due to missing glucose and cholesterol, and 38 (15.4%) due to missing cholesterol, respectively.

Of 81 patients excluded from cohort II, 16 (19.8%) had no laboratory values, 52 (64.2%) had missing ALT/AST, 9 (11.1%) missing platelet count, 2 (2.5%) had missing glucose/cholesterol, one (1.1%) had missing glucose, and another one (1.1%) missing GGT. To compare disease severity, we compared median LSM between included and excluded patients in both cohorts. In cohort I, the median LSM was 6.9 [IQR: 5.1-10.9]kPa for included and 5.9 [IQR: 4.5-7.9]kPa for excluded patients showing a minor but statistically significant difference in terms of a lower LSM in patients with missing laboratory values (Mann-Whitney U test  $p < 0.001$ ). In cohort II, no difference in median LSM was observed (5.8 [IQR: 4.5-8.8]kPa in included vs. 6.5 [IQR: 5.0-10.3]kPa in excluded patients [ $p = 0.090$ ]).

## Supplementary figures

**Fig. S1.** Scatterplot and LOESS curves of LiverRisk score and LSM, FIB-4, and APRI in cohort I (A) and cohort II (B).

**A**

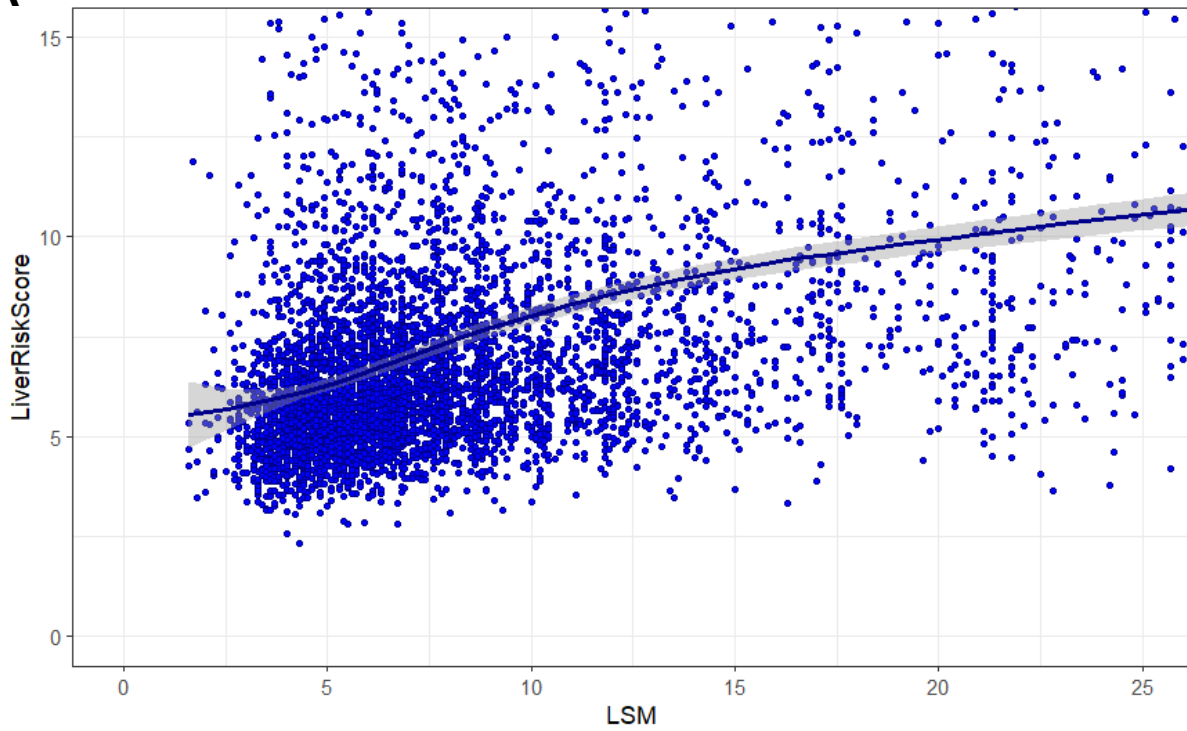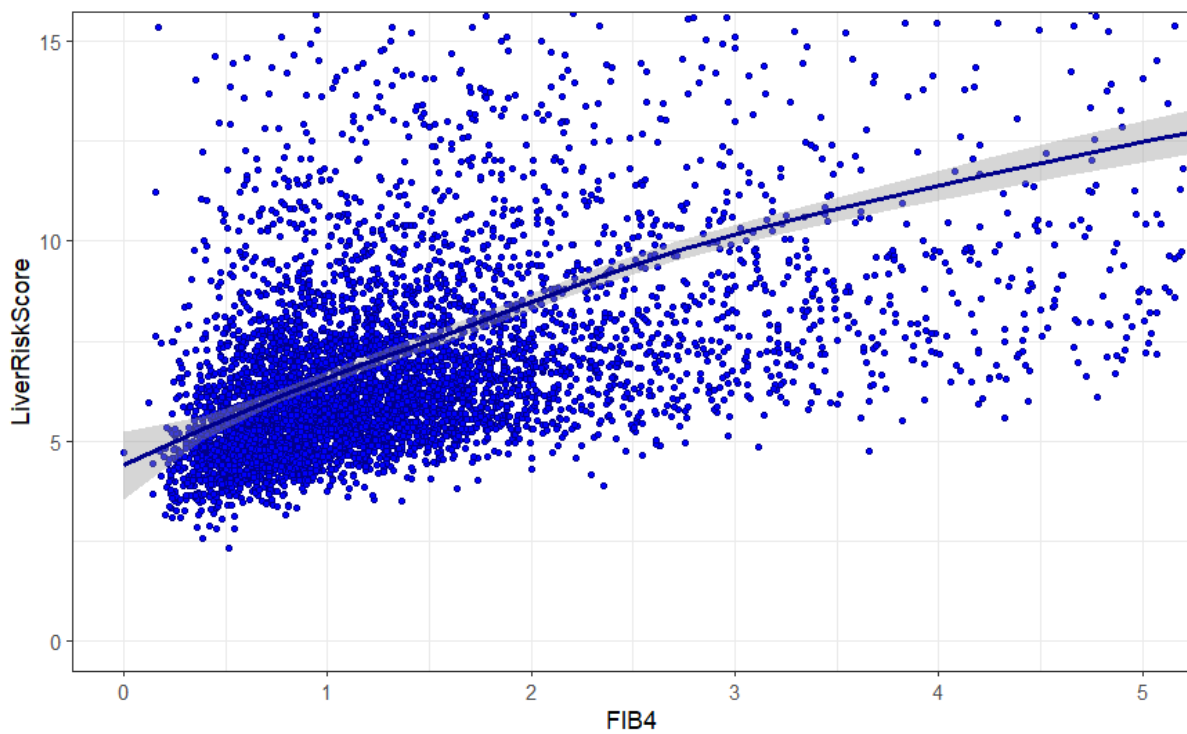

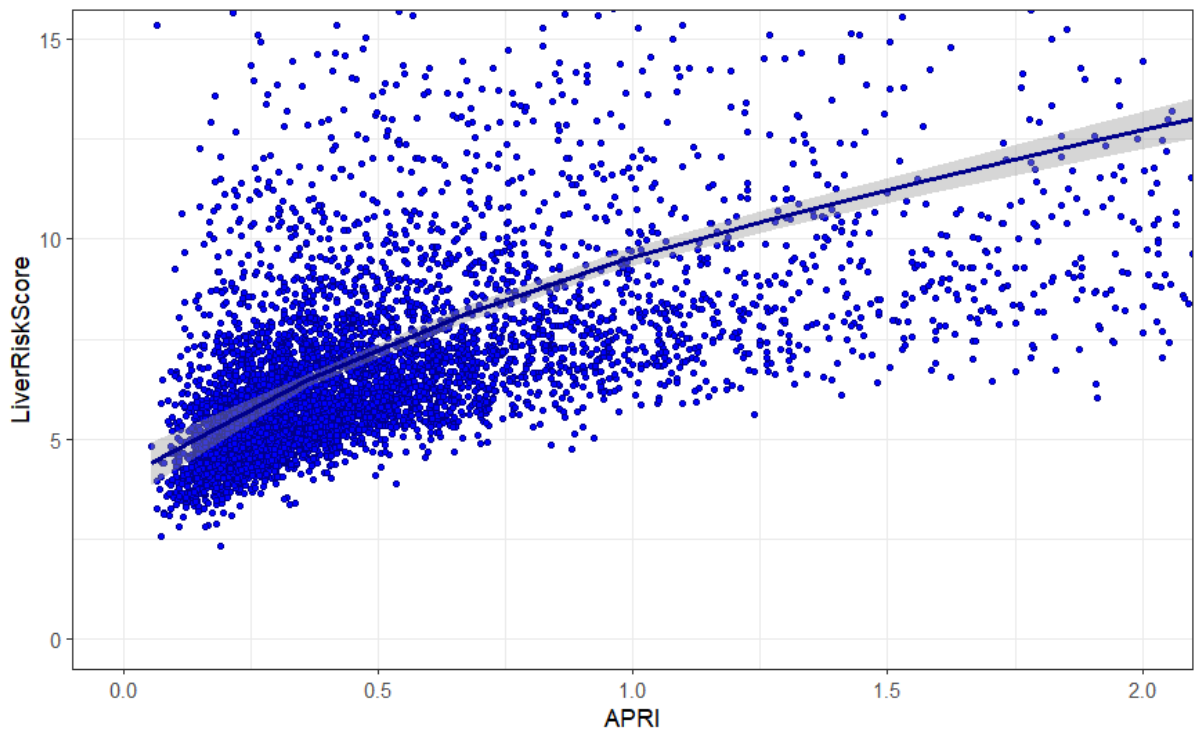

**B**

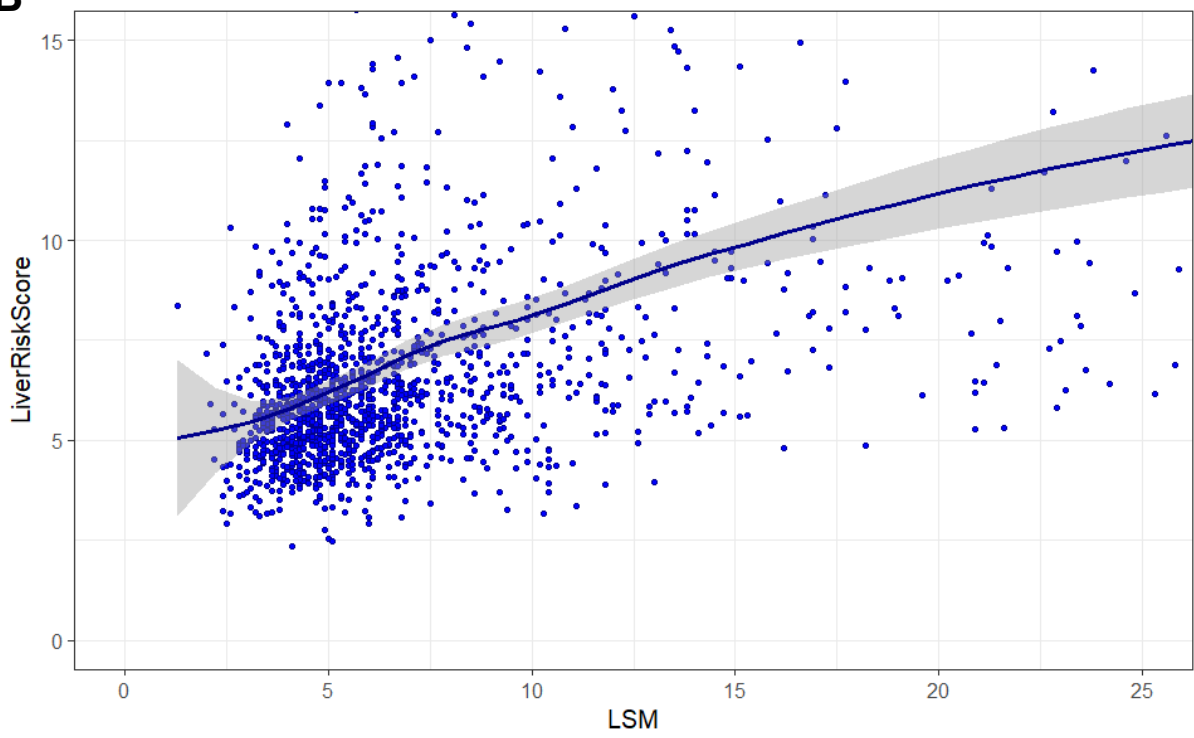

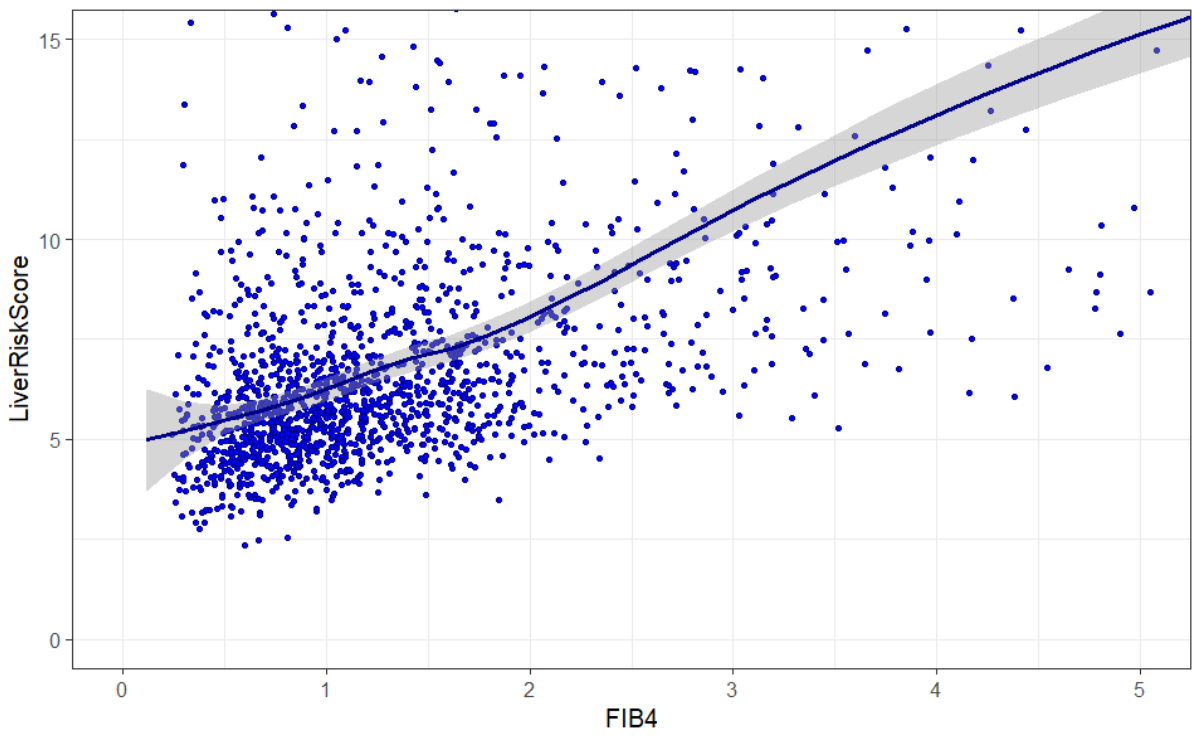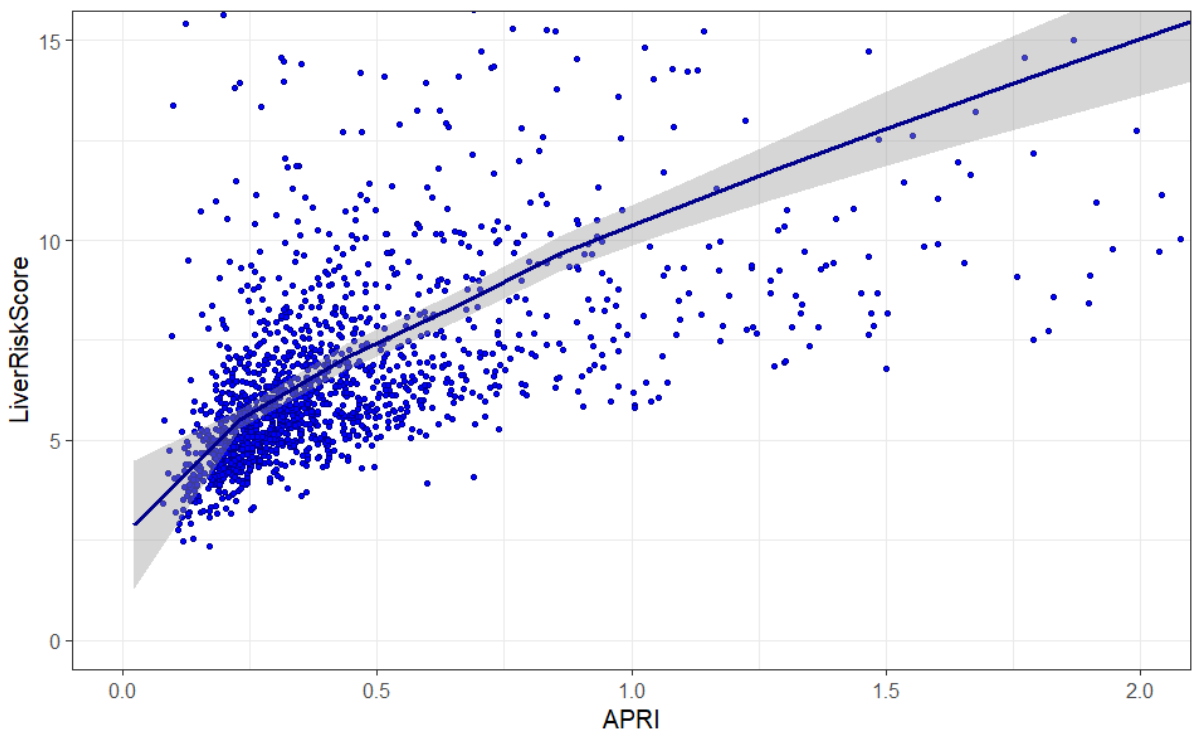

*Abbreviations: APRI – aspartate aminotransferase to platelet ratio index; cACLD – compensated advanced chronic liver disease; FIB-4 – fibrosis 4 score; LOESS - locally estimated scatterplot smoothing; LSM – liver stiffness measurement;*

**Fig. S2.** Receiver operating characteristics (ROC) curves for the detection of cACLD (LSM  $\geq 10$ kPa) using LiverRisk score, FIB-4, and APRI in cohort I (A) and cohort II (B).

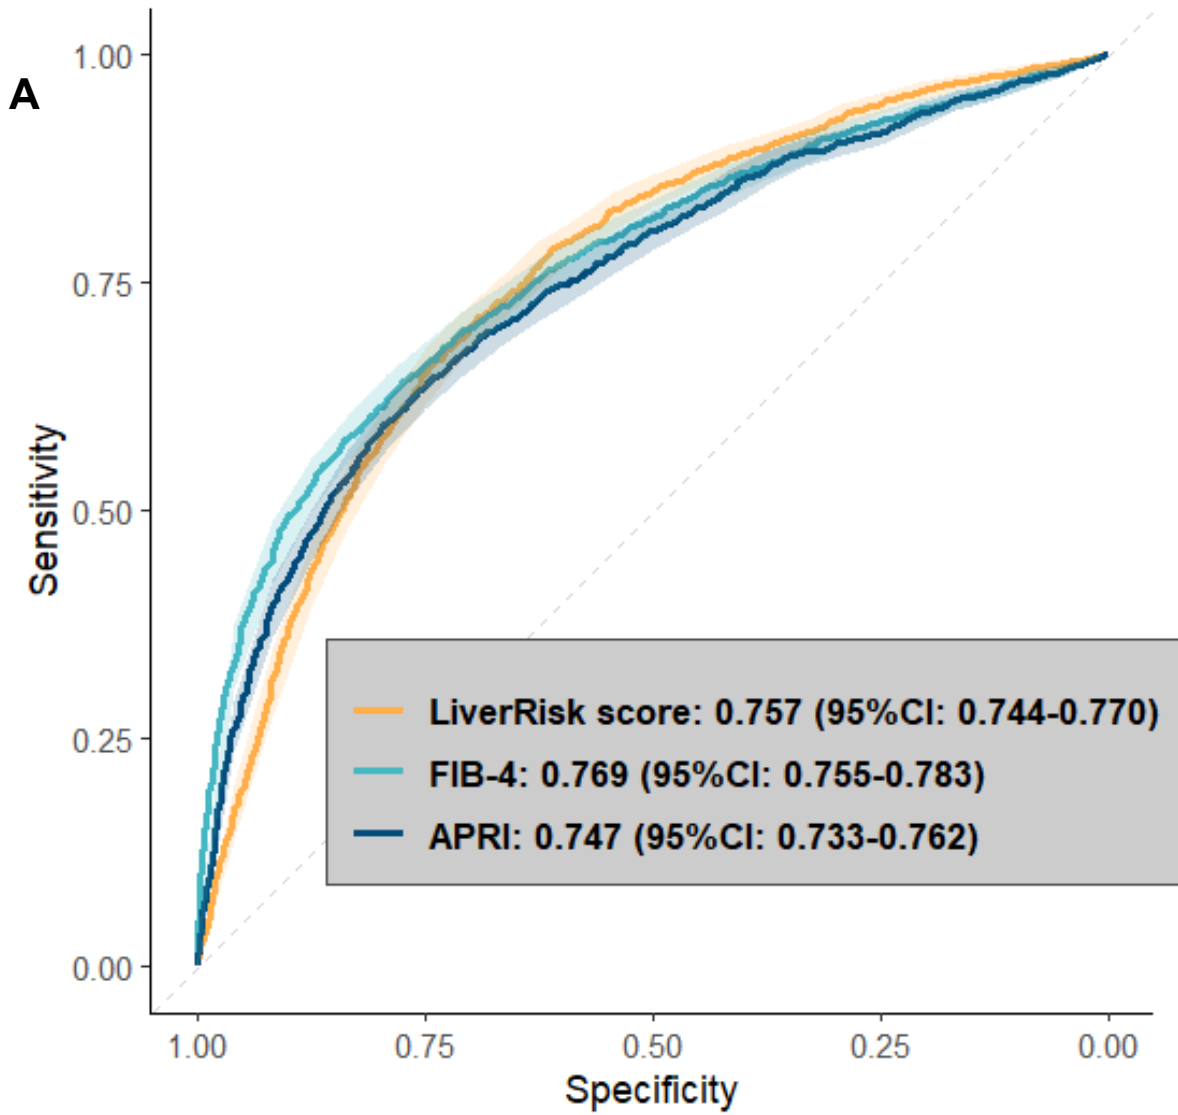

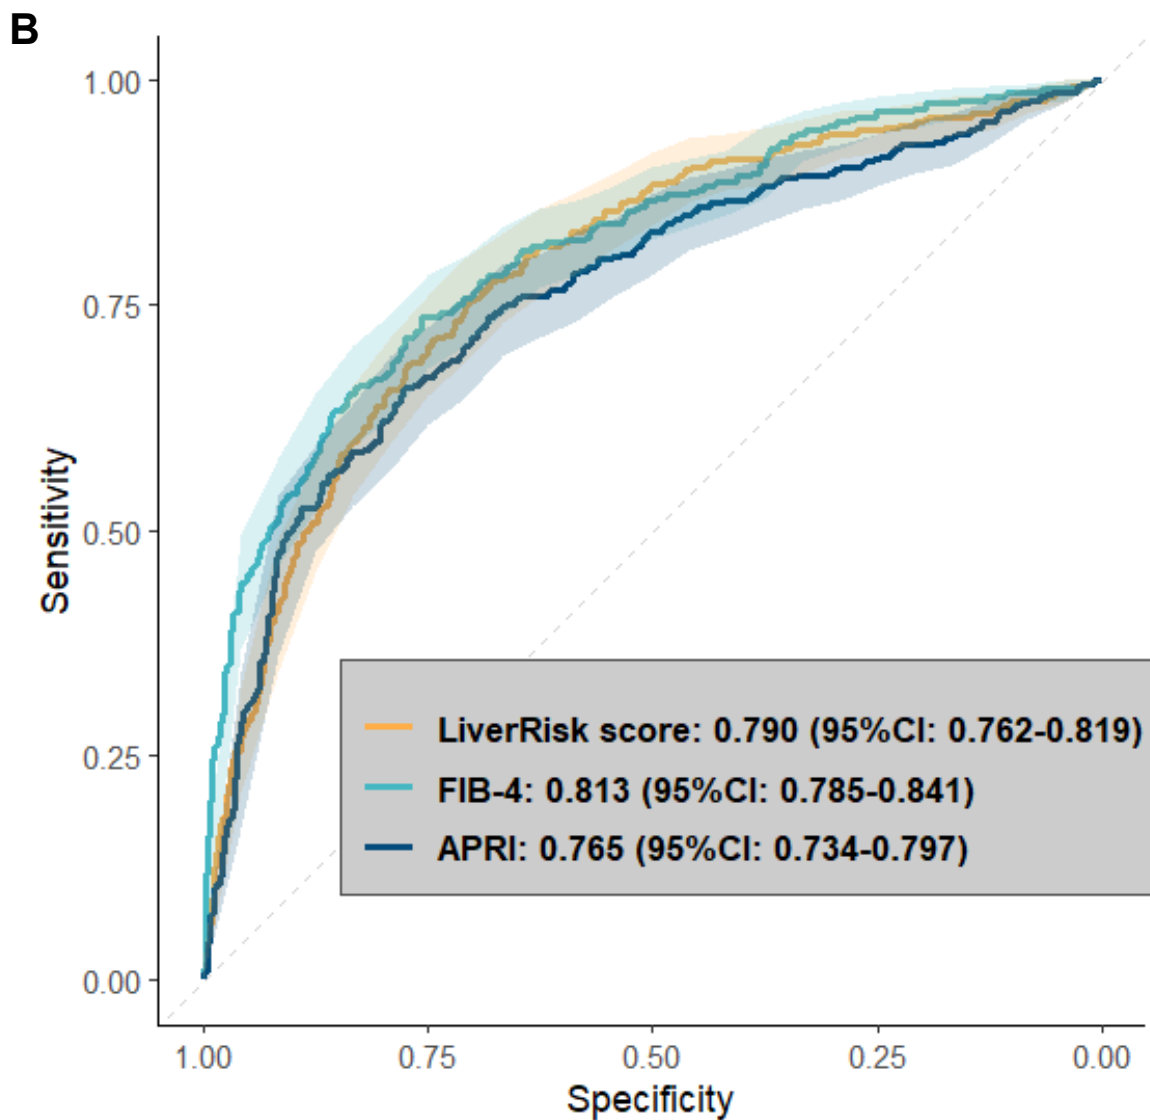

Abbreviations: APRI – aspartate aminotransferase to platelet ratio index; cACLD – compensated advanced chronic liver disease; FIB-4 – fibrosis 4 score; LSM – liver stiffness measurement; ROC – receiver operating characteristics;

**Fig. S3.** Time-dependent area under the receiver operator characteristics curves (AUROC) and 95% confidence intervals (95%CI) of LiverRisk score, LSM, FIB-4, and APRI for the prediction of hepatic decompensation in cohort I at 1-5 years of follow-up.

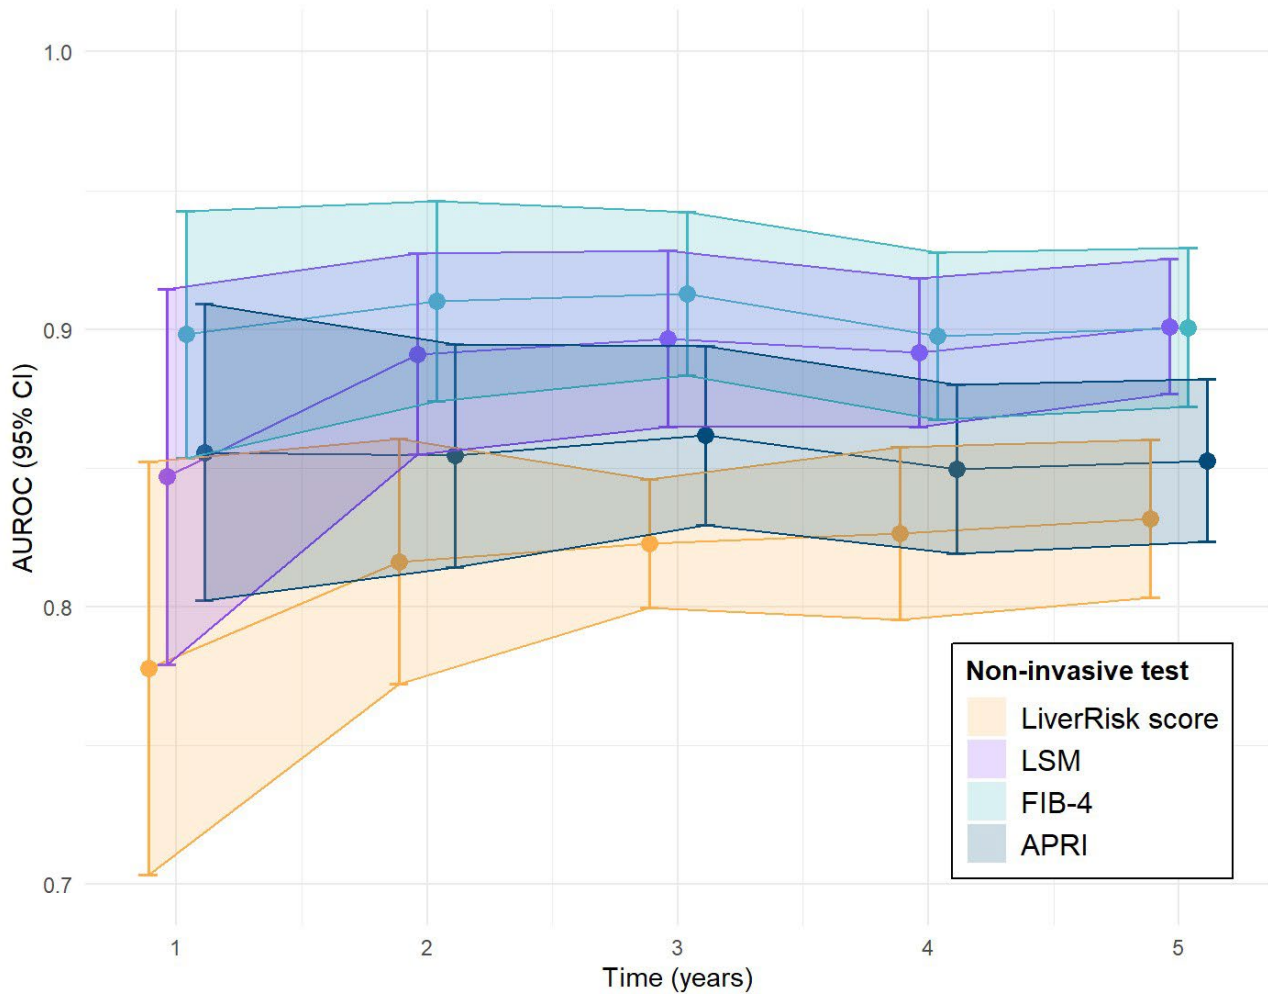

*Abbreviations: AUROC – area under the receiver operator characteristics curve; APRI – aspartate aminotransferase to platelet ratio index; cACLD – compensated advanced chronic liver disease; FIB-4 – fibrosis 4 score; LSM – liver stiffness measurement; 95%CI – 95% confidence interval;*



**Fig. S4.** Cumulative incidence curves of hepatic decompensation compared across categories of LiverRisk score (<6, 6-<10, 10-<15, ≥15) in cohort I. Subdistribution hazard ratios (SHR) are given as compared to the first group. (Fine-Gray subdistribution hazard model)

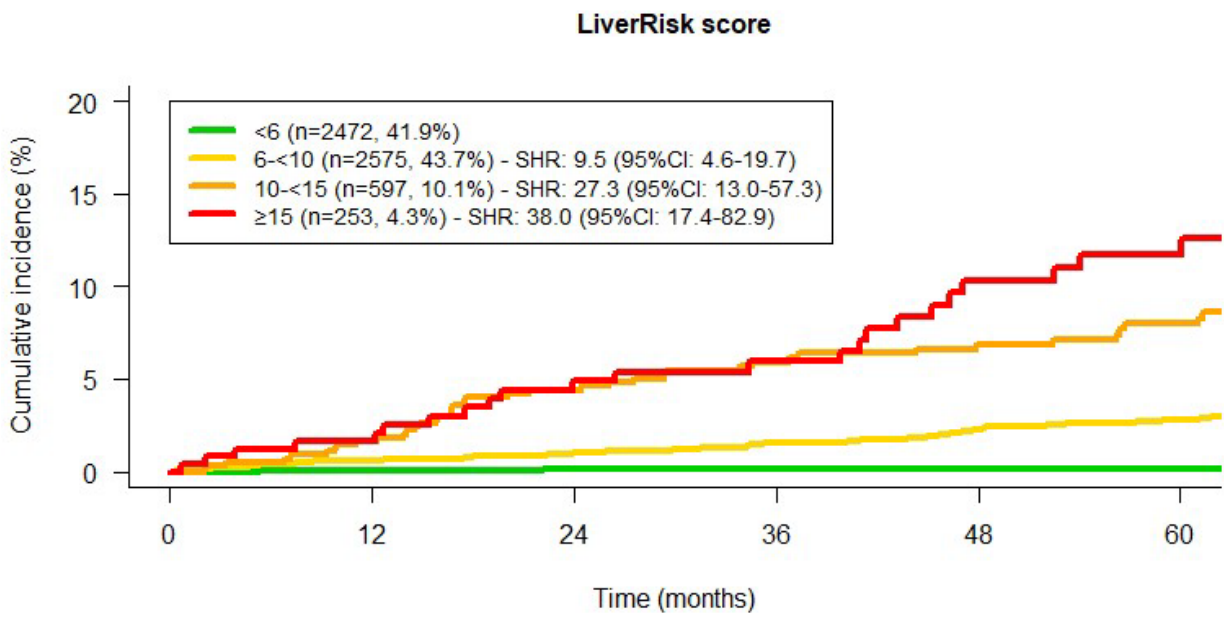

*Abbreviations: LSM – liver stiffness measurement; SHR – subdistribution hazard ratio;*

## Supplementary tables

**Table S1.** Correlation matrix (Spearman's rank correlation coefficient  $\rho$ ) for LiverRisk score, LSM, FIB-4, and APRI in cohort I and cohort II.

| <b>Cohort I</b>  | <b>LiverRisk score</b> | <b>LSM</b> | <b>FIB-4</b> | <b>APRI</b> |
|------------------|------------------------|------------|--------------|-------------|
| LiverRisk score  | 1.000                  | 0.469      | 0.577        | 0.711       |
| LSM              | 0.469                  | 1.000      | 0.448        | 0.452       |
| FIB-4            | 0.577                  | 0.448      | 1.000        | 0.722       |
| APRI             | 0.711                  | 0.452      | 0.722        | 1.000       |
| <b>Cohort II</b> | <b>LiverRisk score</b> | <b>LSM</b> | <b>FIB-4</b> | <b>APRI</b> |
| LiverRisk score  | 1.000                  | 0.471      | 0.535        | 0.684       |
| LSM              | 0.471                  | 1.000      | 0.419        | 0.415       |
| FIB-4            | 0.535                  | 0.419      | 1.000        | 0.617       |
| APRI             | 0.684                  | 0.415      | 0.617        | 1.000       |

*Abbreviations: APRI – aspartate aminotransferase to platelet ratio index; FIB-4 – fibrosis 4 score; LSM – liver stiffness measurement;*

**Table S2.** Cohen’s Kappa and 95% confidence intervals (95%CI) between LSM  $\geq 10$ kPa and LiverRisk score  $\geq 10$ points in cohort I and cohort II both in the overall cohorts as well as across etiology subgroups.

|                 | <b>Cohort I,<br/>n=5897</b> | <b>Cohort II,<br/>n=1558</b> |
|-----------------|-----------------------------|------------------------------|
| Overall cohort  | 0.260 (0.233-0.286)         | 0.327 (0.268-0.385)          |
| MASLD           | 0.237 (0.183-0.292)         | 0.338 (0.257-0.420)          |
| ALD             | 0.210 (0.110-0.309)         | 0.337 (0.190-0.483)          |
| Viral           | 0.255 (0.220-0.290)         | 0.143 (0.023-0.263)          |
| AIH/Cholestatic | 0.309 (0.217-0.401)         | 0.330 (0.122-0.538)          |
| Other           | 0.150 (0.030-0.270)         | -0.071 (-0.345-0.204)        |

*Abbreviations: AIH – autoimmune hepatitis; ALD – alcohol-related liver disease; LSM – liver stiffness measurement; MASLD – metabolic dysfunction-associated steatotic liver disease; 95%CI – 95% confidence interval;*

**Table S3.** Correlation, calibration, and agreement metrics between the LiverRisk score and LSM, as well as metrics on the diagnostic accuracy of LiverRisk score for the diagnosis of cACLD in cohort I and cohort II in the subgroup of patients meeting reliability criteria for liver fibrosis assessment ( $\leq 7\text{kPa}$  or IQR/median  $< 0.3$ ). (Pearson's r, linear regression, Bland-Altman analysis, ROC analysis)

| Outcome                       | Metric                                                                                        | Cohort I,<br>n=5509      | Cohort II,<br>n=1430     |
|-------------------------------|-----------------------------------------------------------------------------------------------|--------------------------|--------------------------|
| LSM (kPa, linear)             | Pearson's r (correlation, strong calibration)                                                 | 0.323                    | 0.431                    |
|                               | R <sup>2</sup> (variation, strong calibration)                                                | 0.104                    | 0.185                    |
|                               | Intercept (weak calibration)                                                                  | 4.225 (SE: 0.265)        | 1.354 (SE: 0.451)        |
|                               | Slope (weak calibration)                                                                      | 0.775 (SE: 0.031)        | 0.977 (SE: 0.054)        |
|                               | Mean difference (95%CI) <sup>1</sup> $\triangleq$ Calibration in the large (mean calibration) | 2.54 (2.28-2.80)         | 1.19 (0.75-1.63)         |
|                               | Lower limit of agreement (95%CI) <sup>1</sup>                                                 | -16.87 (-17.32-[-16.42]) | -15.57 (-16.33-[-14.82]) |
|                               | Upper limit of agreement (95%CI) <sup>1</sup>                                                 | 21.95 (21.50-22.40)      | 17.96 (17.20-18.71)      |
|                               | Interval of agreement (kPa/points; 95%CI) <sup>1</sup>                                        | 38.82                    | 33.53                    |
| cACLD ( $\geq 10\text{kPa}$ ) | Prevalence (%)                                                                                | 1423 (25.8%)             | 242 (16.9%)              |
|                               | AUROC (95%CI)                                                                                 | 0.765 (0.751-0.779)      | 0.816 (0.786-0.845)      |
|                               | Sensitivity <sup>2</sup> (95%CI)                                                              | 31.3% (28.9-33.8%)       | 38.0% (31.9-44.5%)       |
|                               | Specificity <sup>2</sup> (95%CI)                                                              | 92.0% (91.1-92.8%)       | 93.2% (91.6-94.6%)       |
|                               | Positive predictive value <sup>2</sup> (95%CI)                                                | 57.6% (54.4-60.7%)       | 53.2% (46.6-59.7%)       |
|                               | Negative predictive value <sup>2</sup> (95%CI)                                                | 79.4% (78.8-80.0%)       | 88.1% (87.0-89.1%)       |
|                               | Accuracy <sup>2</sup> (95%CI)                                                                 | 76.3% (75.2-77.4%)       | 83.9% (81.8-85.7%)       |

<sup>1</sup> based on Bland-Altman analysis (LSM – LiverRisk score); <sup>2</sup> applying at cut-off of 10 points corresponding to 10kPa

*Abbreviations: AUROC – area under the receiver operator characteristics curve; cACLD – compensated advanced chronic liver disease; LSM – liver stiffness measurement; ROC – receiver operator characteristics; SE – standard error; 95%CI – 95% confidence interval;*

**Table S4.** Area under the receiver operator characteristics curve (AUROC) and 95% confidence intervals (95%CI) of LiverRisk score, FIB-4 and APRI for the diagnosis of cACLD in cohort I and cohort II, as well as time-dependent AUROC of LiverRisk score, LSM, FIB-4 and APRI for the prediction of hepatic decompensation in cohort I in the subgroup of patients meeting reliability criteria for liver fibrosis assessment ( $\leq 7$ kPa or IQR/median  $< 0.3$ ). (ROC analysis, time-dependent ROC analysis, comparison according to Blanche et al [2013], Level of significance after multiplicity correction:  $p < 0.05$ )

| Outcome                   | Metric           | Cohort I, n=5509            |                             |                             | Cohort II, n=1430           |                             |
|---------------------------|------------------|-----------------------------|-----------------------------|-----------------------------|-----------------------------|-----------------------------|
| cACLD<br>( $\geq 10$ kPa) | LiverRisk score  | 0.765 (0.751-0.779)         |                             |                             | 0.816 (0.786-0.845)         |                             |
|                           | FIB-4            | 0.782 (0.767-0.797)         |                             |                             | 0.826 (0.796-0.857)         |                             |
|                           | APRI             | 0.760 (0.745-0.775)         |                             |                             | 0.781 (0.746-0.816)         |                             |
| Hepatic decompensation    |                  | <b>Cohort I, n=5509</b>     |                             |                             |                             |                             |
|                           | Time             | 1 year                      | 2 years                     | 3 years                     | 4 years                     | 5 years                     |
|                           | Number of events | 24                          | 51                          | 70                          | 92                          | 101                         |
|                           | LiverRisk score  | 0.772<br>(0.690-<br>0.855)  | 0.809<br>(0.760-<br>0.858)  | 0.820<br>(0.782-<br>0.858)  | 0.829<br>(0.797-<br>0.862)  | 0.833<br>(0.802-<br>0.863)  |
|                           | LSM              | 0.860<br>(0.786-<br>0.934)* | 0.898<br>(0.859-<br>0.937)* | 0.904<br>(0.872-<br>0.937)* | 0.901<br>(0.875-<br>0.928)* | 0.906<br>(0.882-<br>0.931)* |
|                           | FIB-4            | 0.905<br>(0.860-<br>0.951)* | 0.909<br>(0.869-<br>0.949)* | 0.913<br>(0.881-<br>0.945)* | 0.896<br>(0.864-<br>0.928)* | 0.903<br>(0.874-<br>0.932)* |
|                           | APRI             | 0.862<br>(0.804-<br>0.919)  | 0.855<br>(0.810-<br>0.900)  | 0.864<br>(0.829-<br>0.899)  | 0.851<br>(0.819-<br>0.882)  | 0.852<br>(0.820-<br>0.884)  |

*\* Indicates a statistically significant difference in AUROC as compared to the LiverRisk score (according to Blanche et al [2013])*

*Abbreviations: AUROC – area under the receiver operator characteristics curve; cACLD – compensated advanced chronic liver disease; LSM – liver stiffness measurement; ROC – receiver operator characteristics; 95%CI – 95% confidence interval;*
